# Supplementary material
Source: ML conference proceedings conference paper supplement (https://openreview.net/forum?id=XYP3IZ9vSc)

**SparseTag**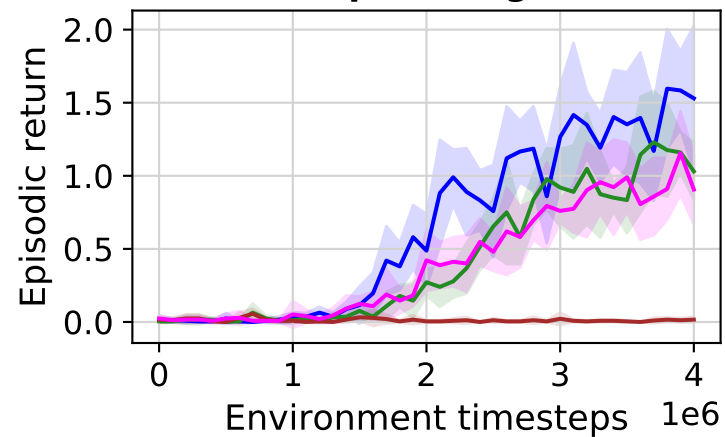**Adversary**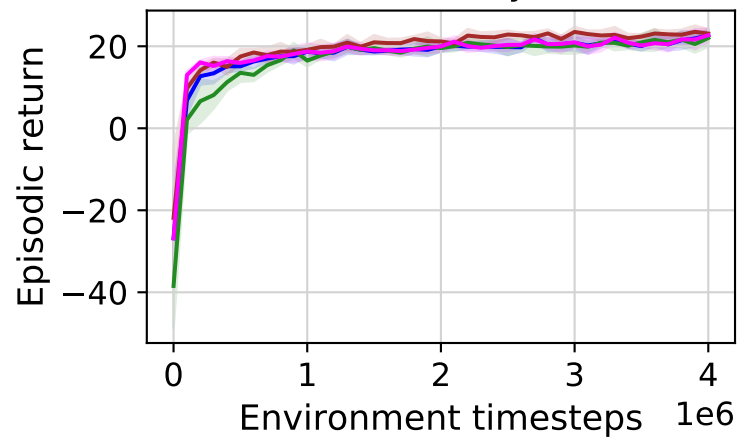**SparseSpread**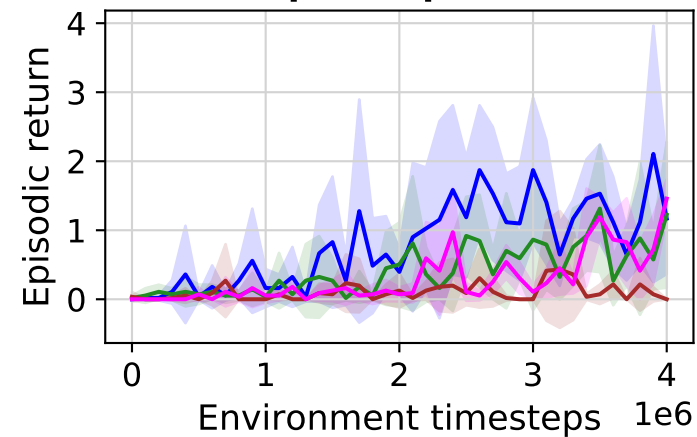**Foraging-10x10-3p-3f**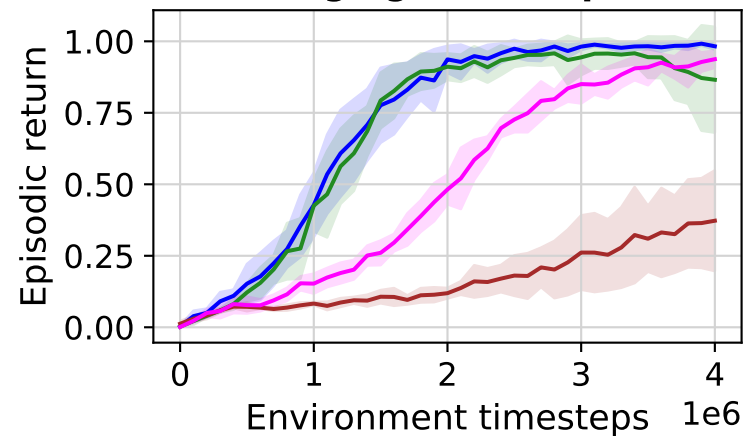**Foraging-15x15-3p-5f**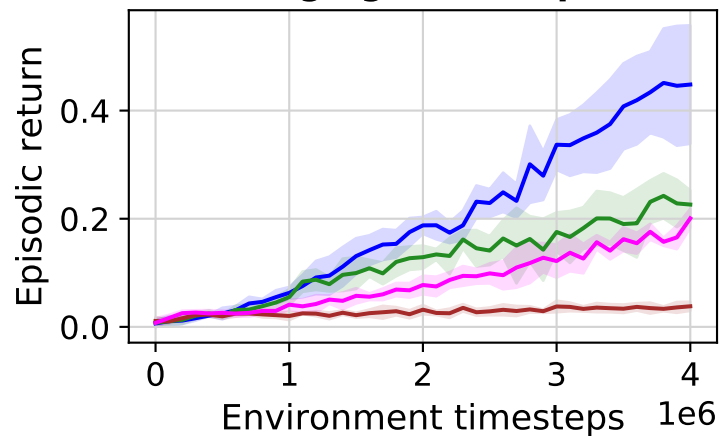**Foraging-15x15-4p-3f**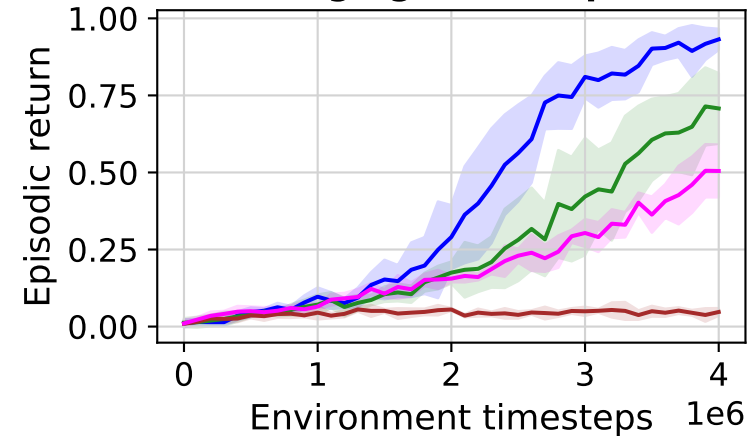**Foraging-15x15-4p-5f**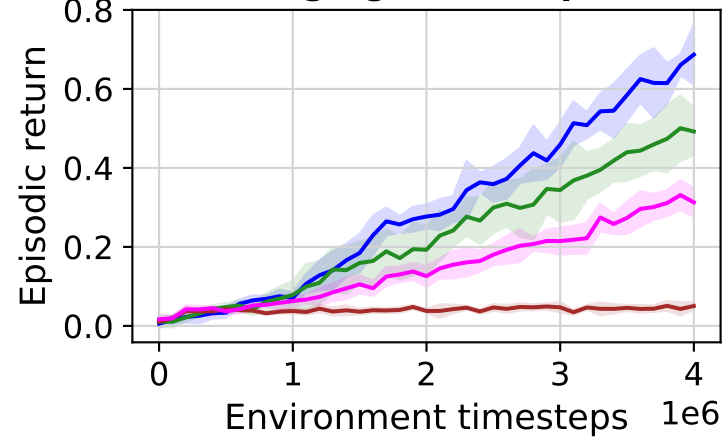**2s-vs-1sc**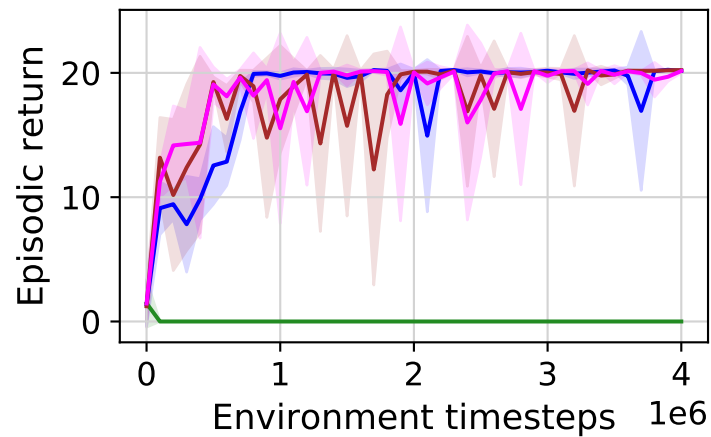**3s-vs-5z**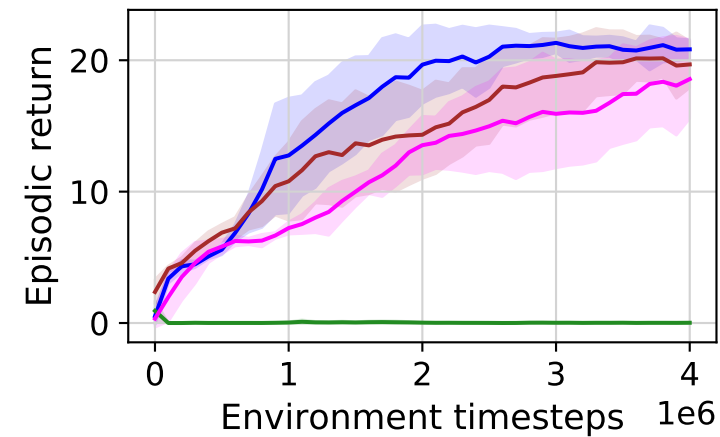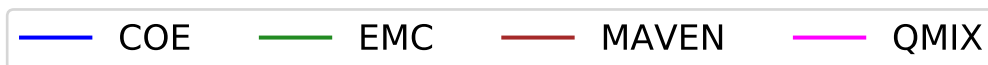

Supplement: supplementary_material [file attachment]
