# Supplementary material
Source: ML conference proceedings conference paper supplement (https://openreview.net/forum?id=XYP3IZ9vSc)

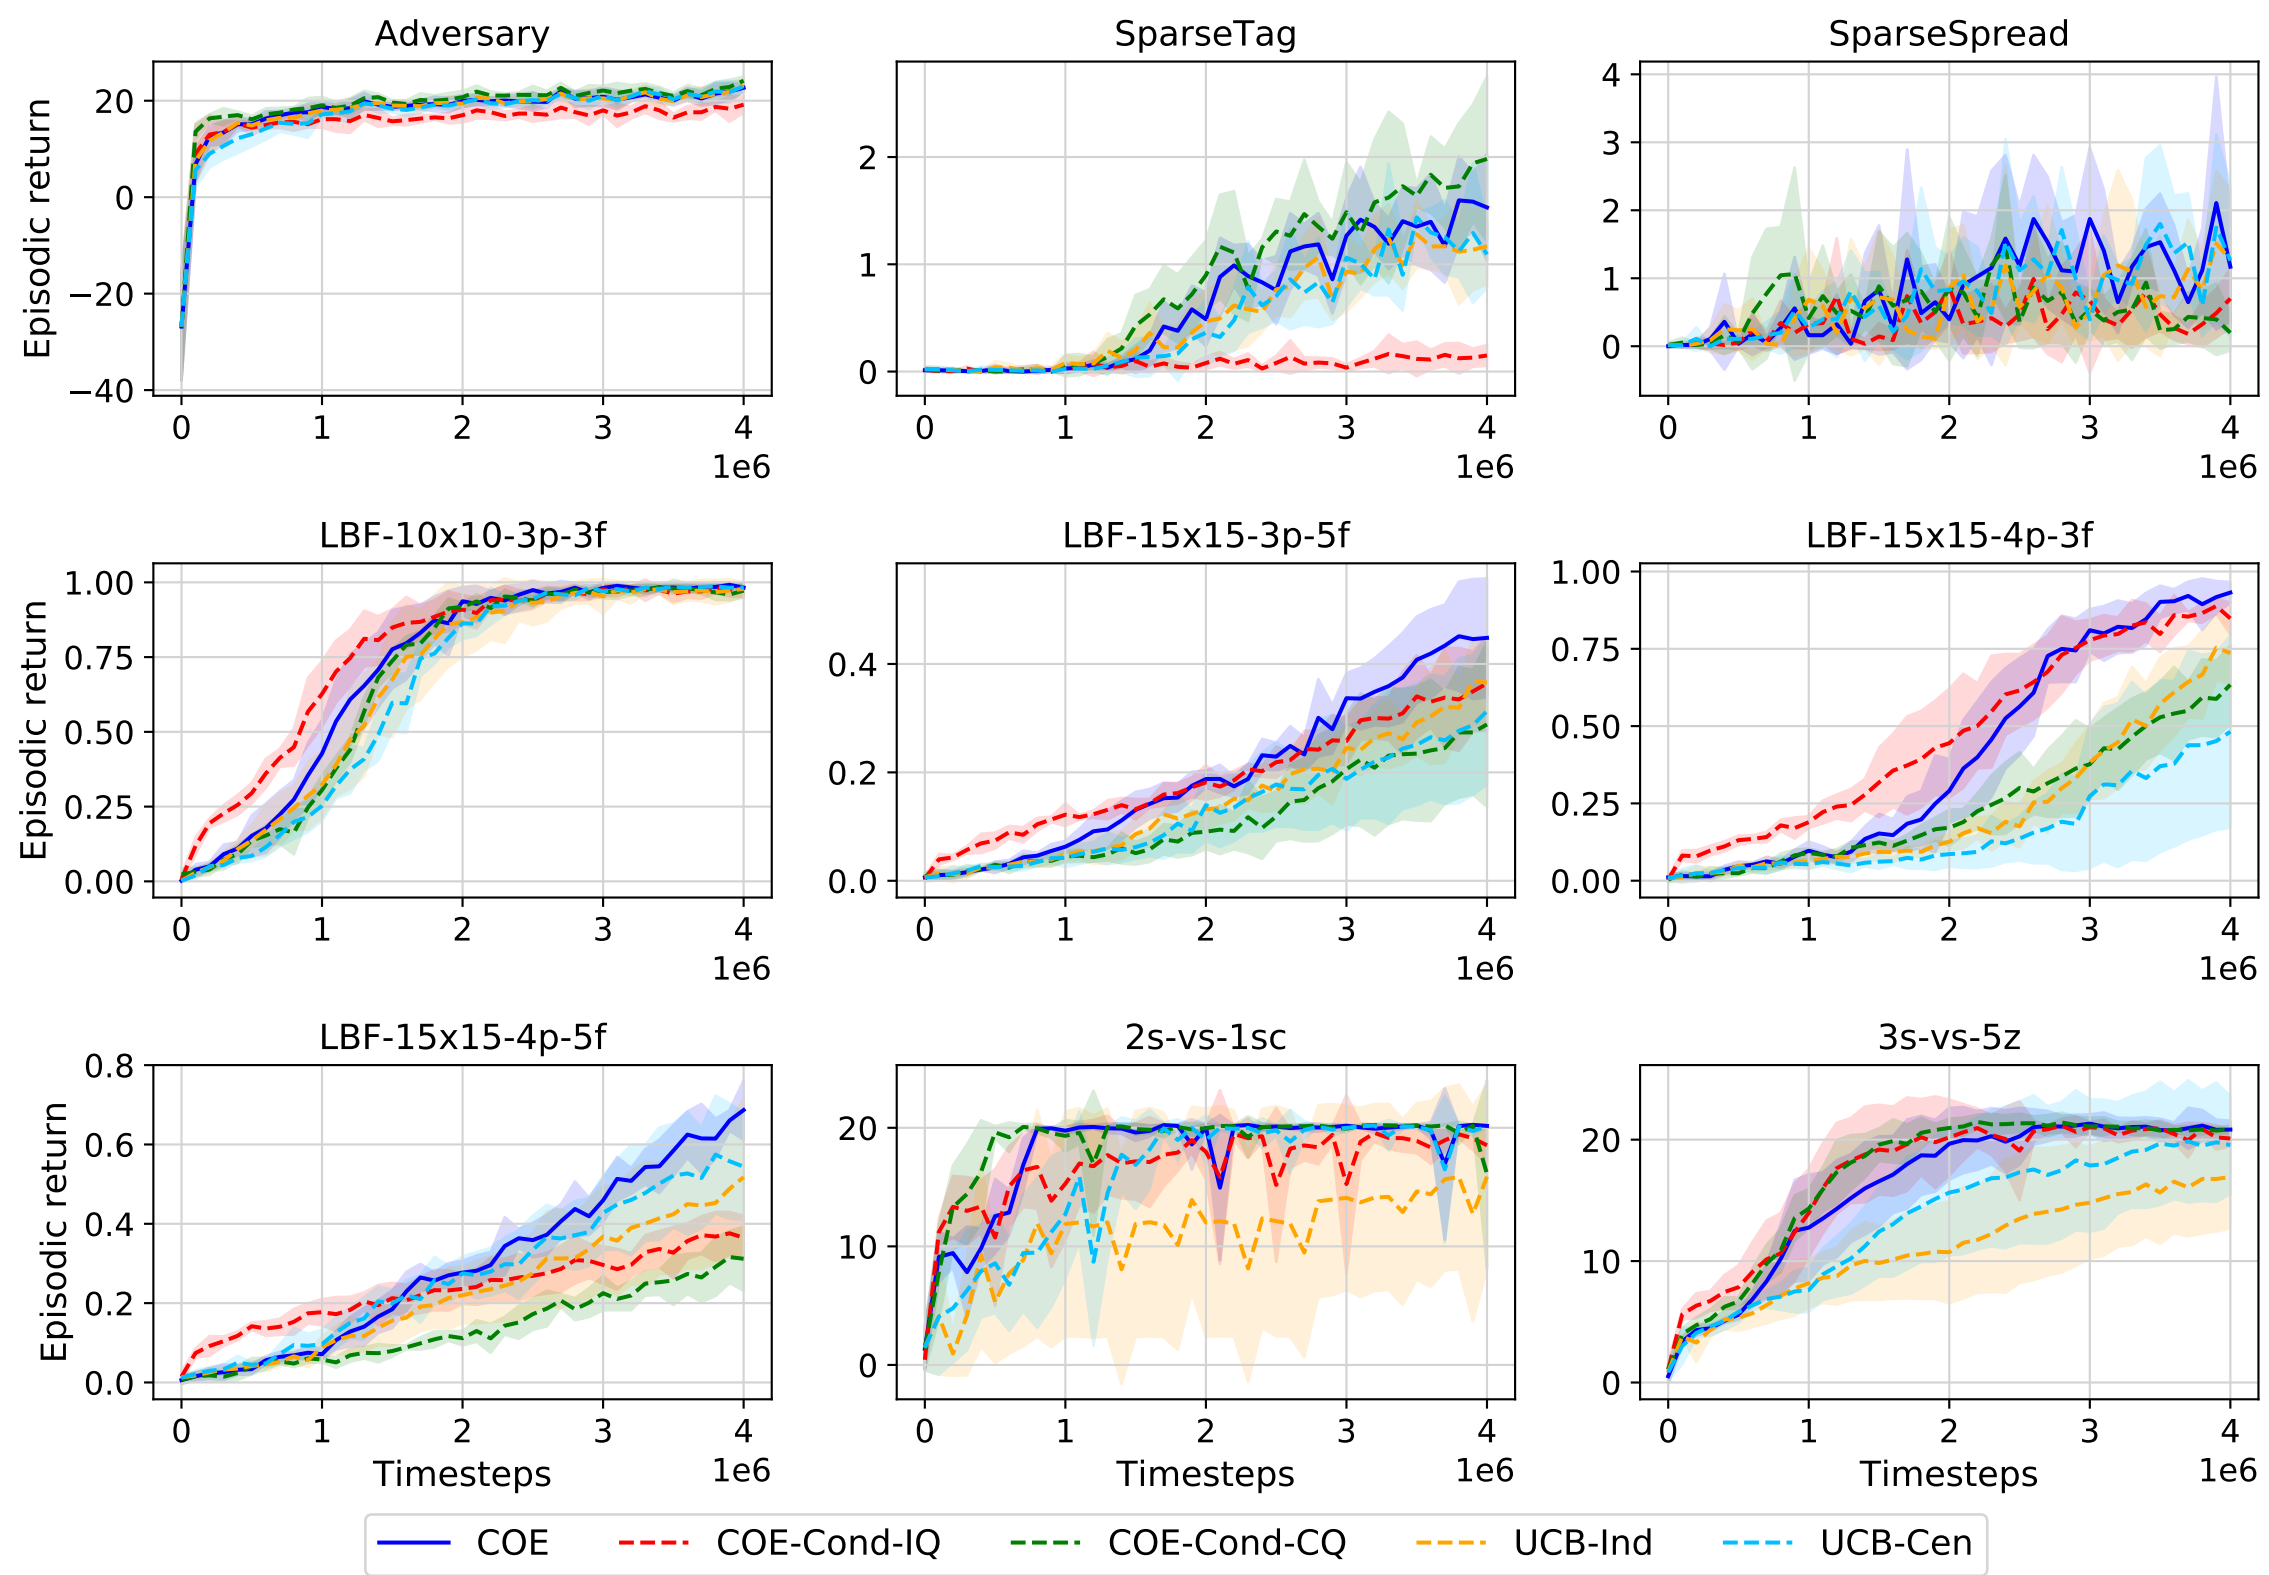

Supplement: supplementary_material [file attachment]

Adversary

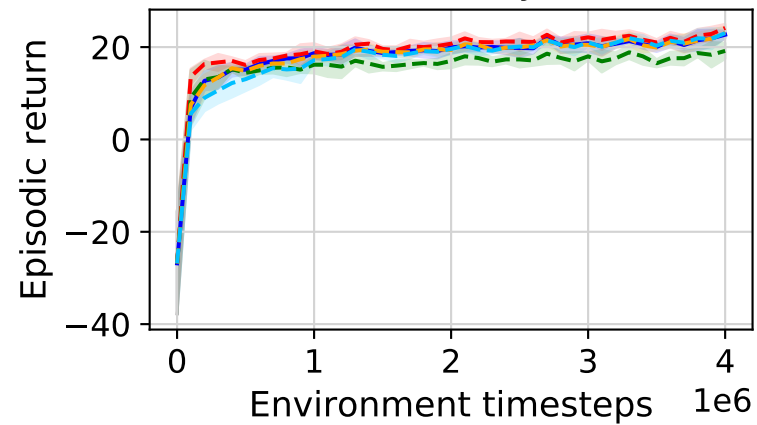

Foraging-10x10-3p-3f

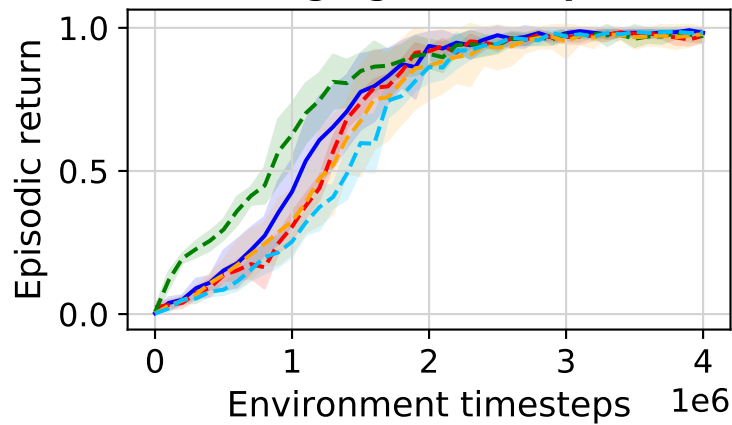

Foraging-15x15-4p-5f

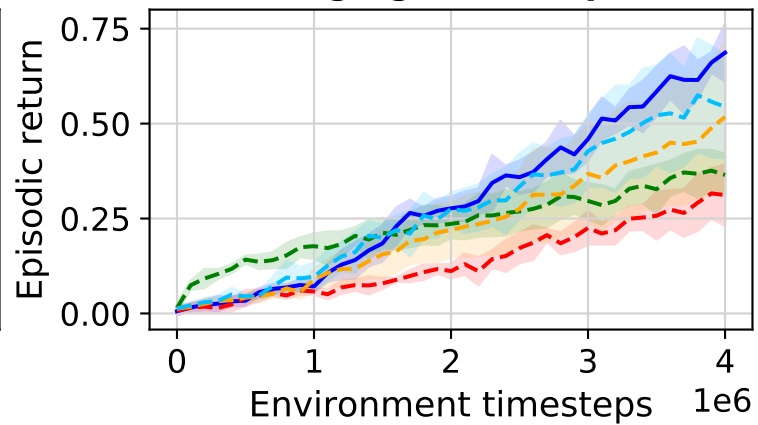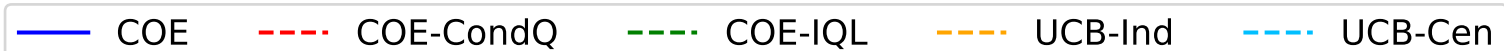

Supplement: supplementary_material [file attachment]

**SparseTag**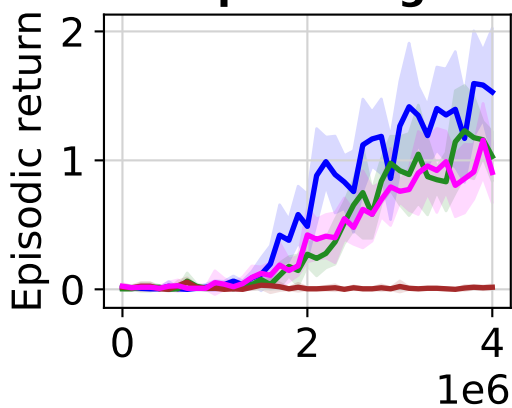**SparseSpread**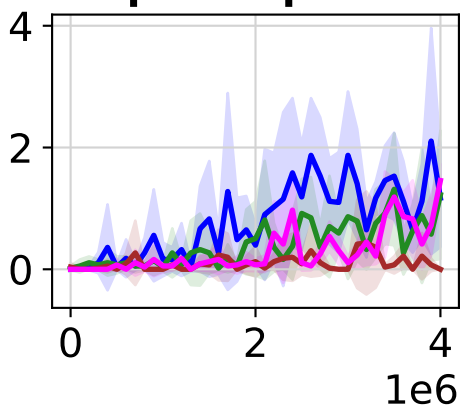**LBF-10x10-3p-3f**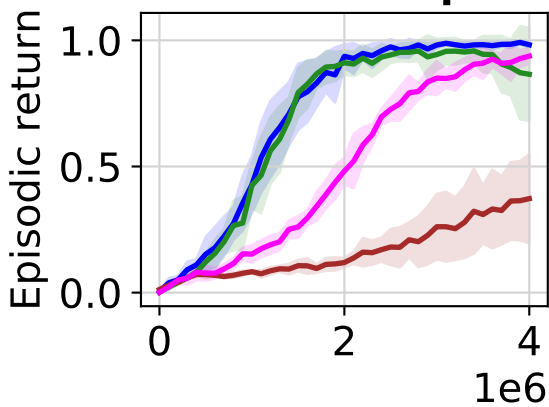**LBF-15x15-3p-5f**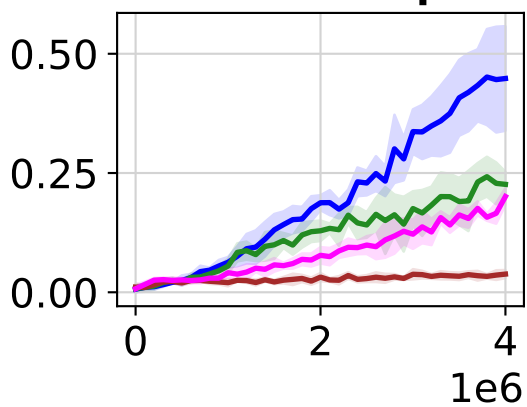**LBF-15x15-4p-3f**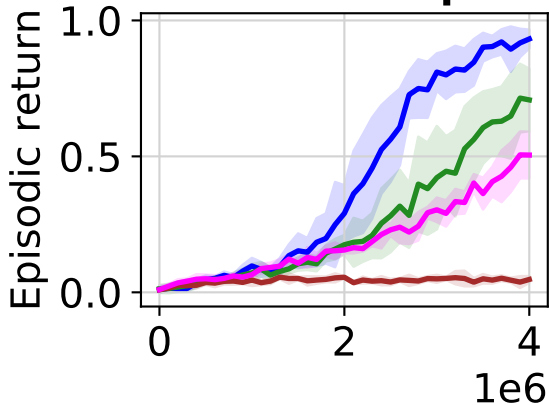**LBF-15x15-4p-5f**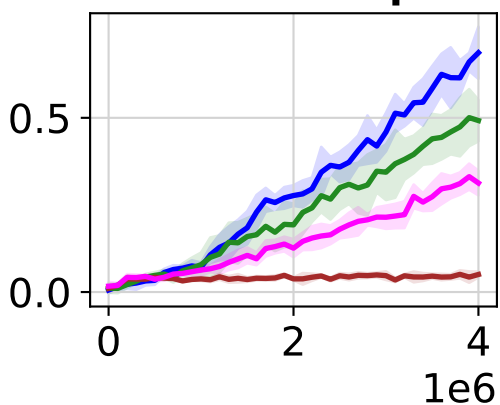**2s-vs-1sc**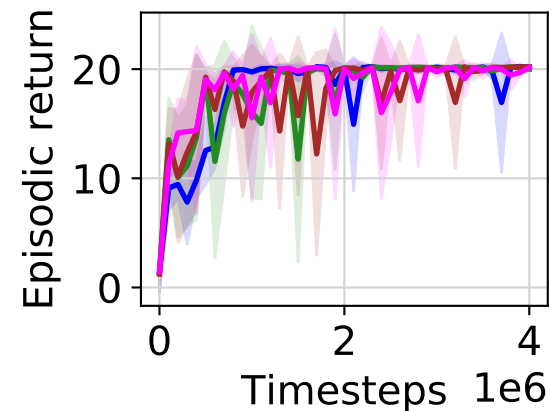**3s-vs-5z**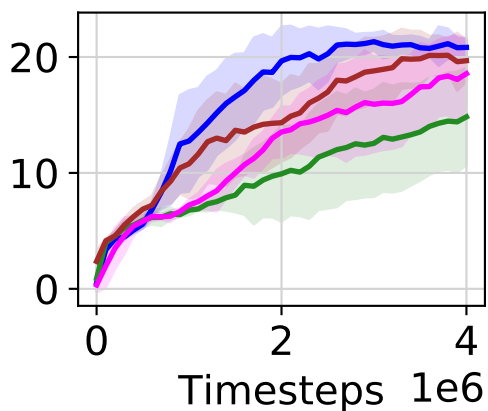

— COE

— EMC

— MAVEN

— QMIX

Supplement: supplementary_material [file attachment]

**SparseTag**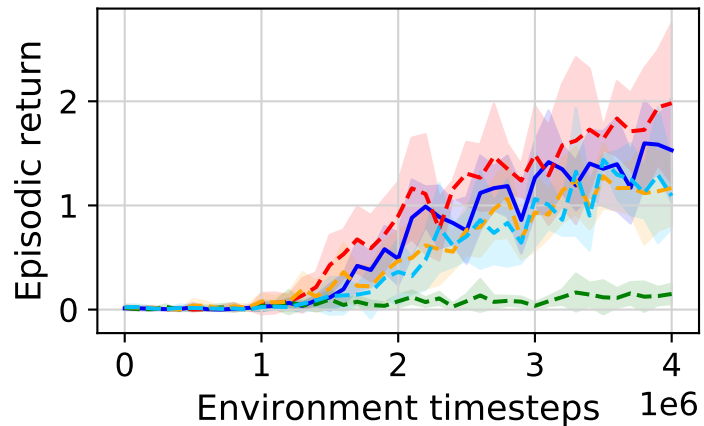**SparseSpread**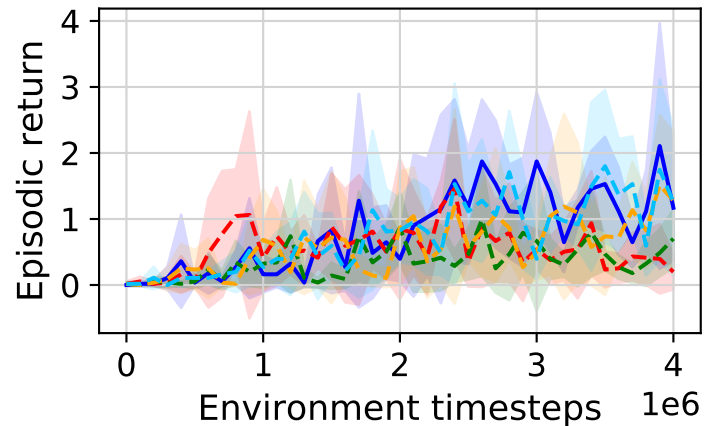**Foraging-15x15-3p-5f**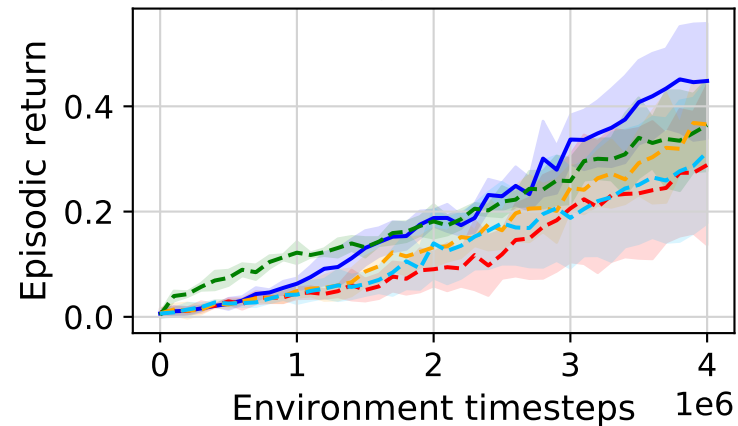**Foraging-15x15-4p-3f**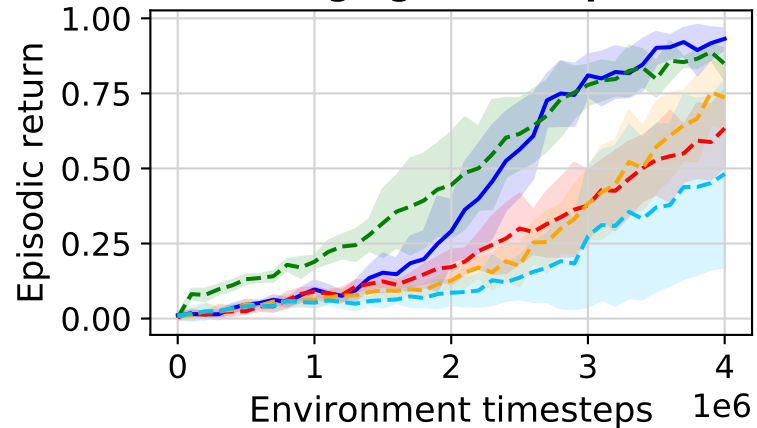**2s-vs-1sc**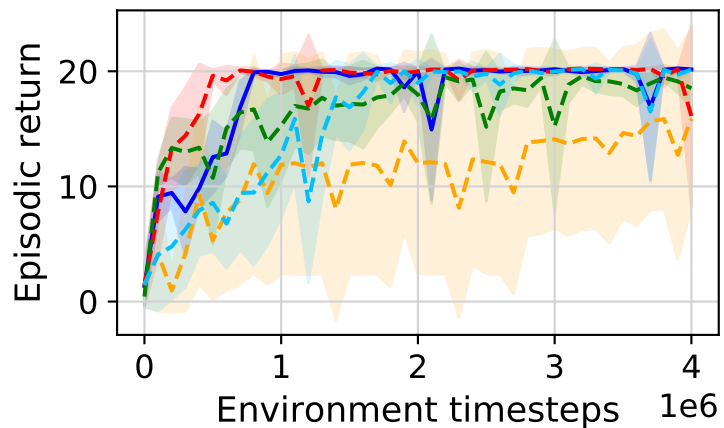**3s-vs-5z**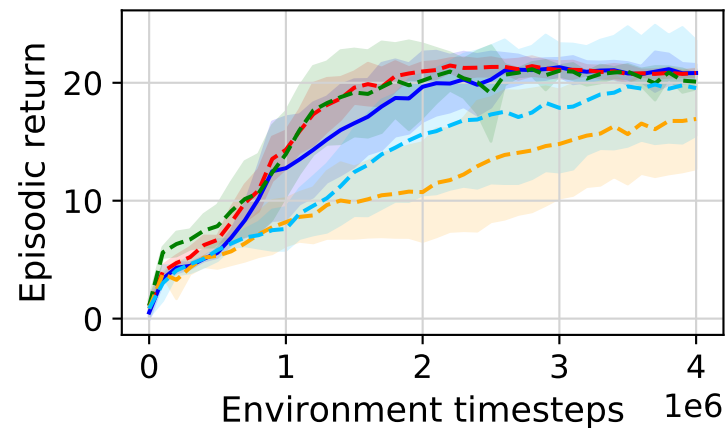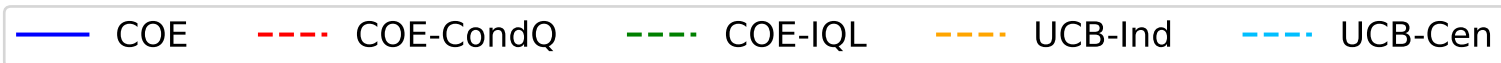

Supplement: supplementary_material [file attachment]

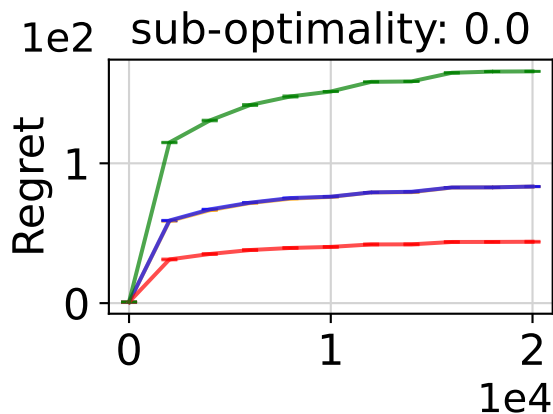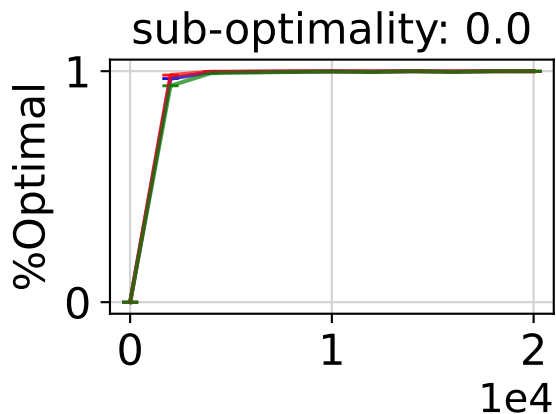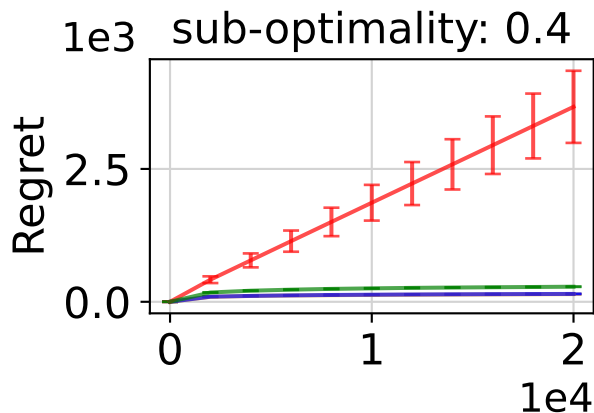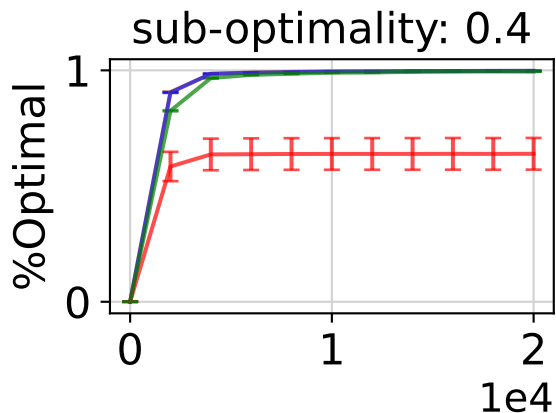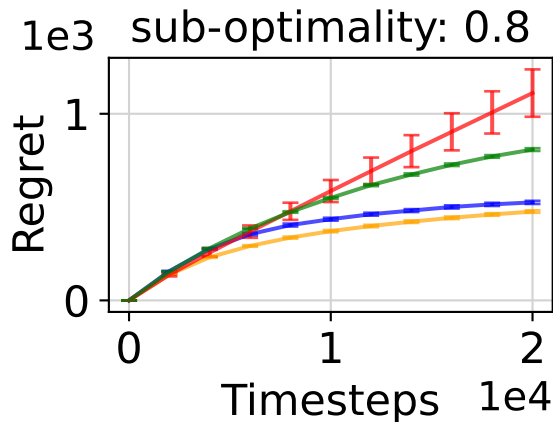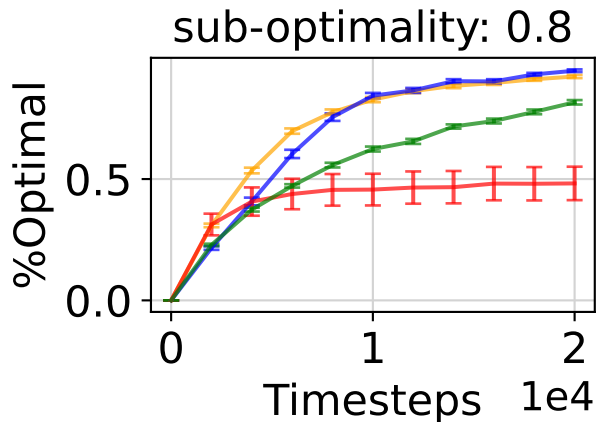

DepRew-DepOpt

IndRew-DepOpt

IndRew-IndOpt

UCB-Cen

Supplement: supplementary_material [file attachment]

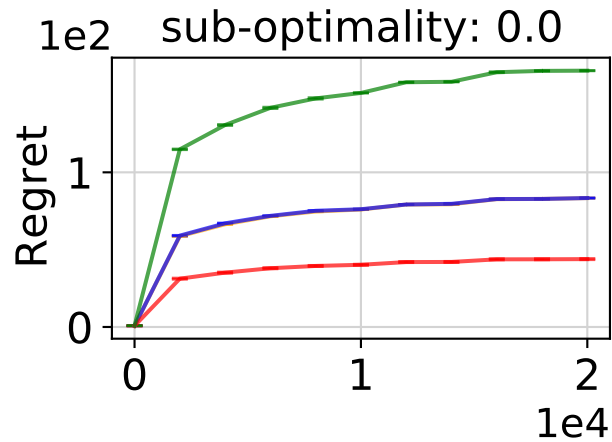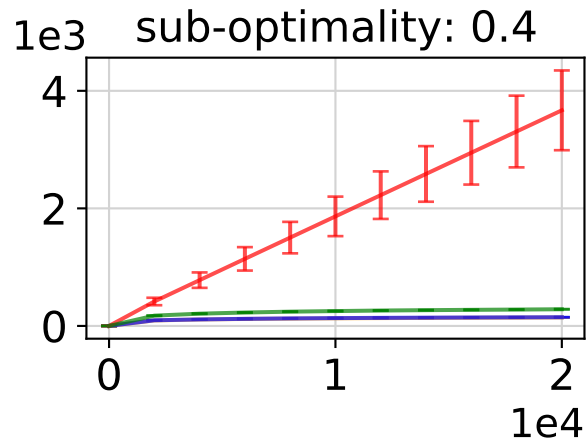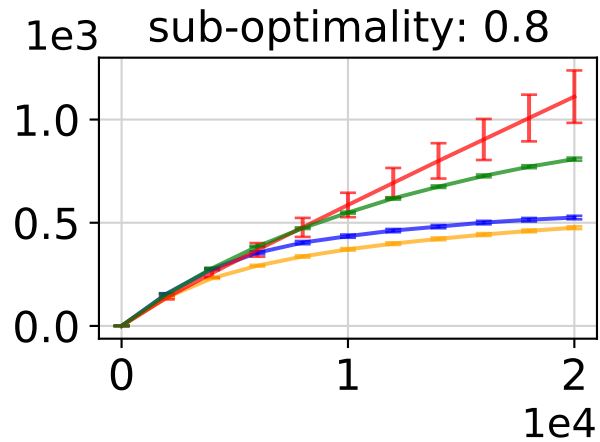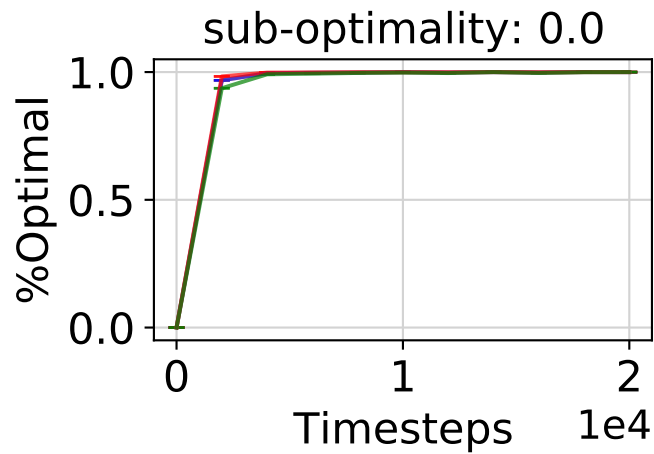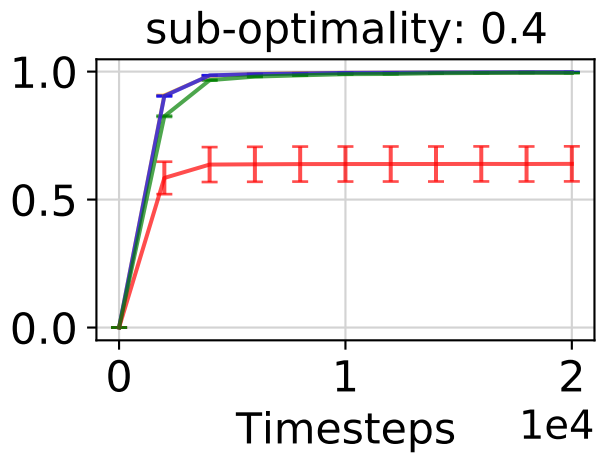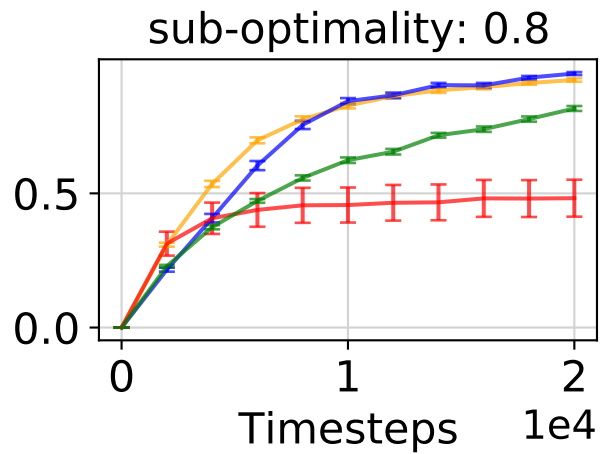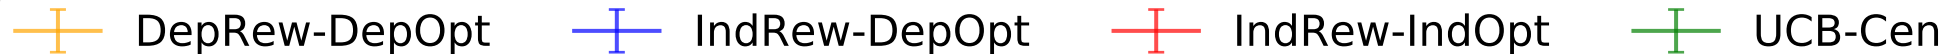

Supplement: supplementary_material [file attachment]
